# Supplementary material for: RNA-Sequencing-Based Transcriptomic Score with Prognostic and Theranostic Values in Multiple Myeloma
Source: MDPI journal article supplement (doi:10.3390/jpm11100988), 2021-09-30
Supplement: s1 [file s1]

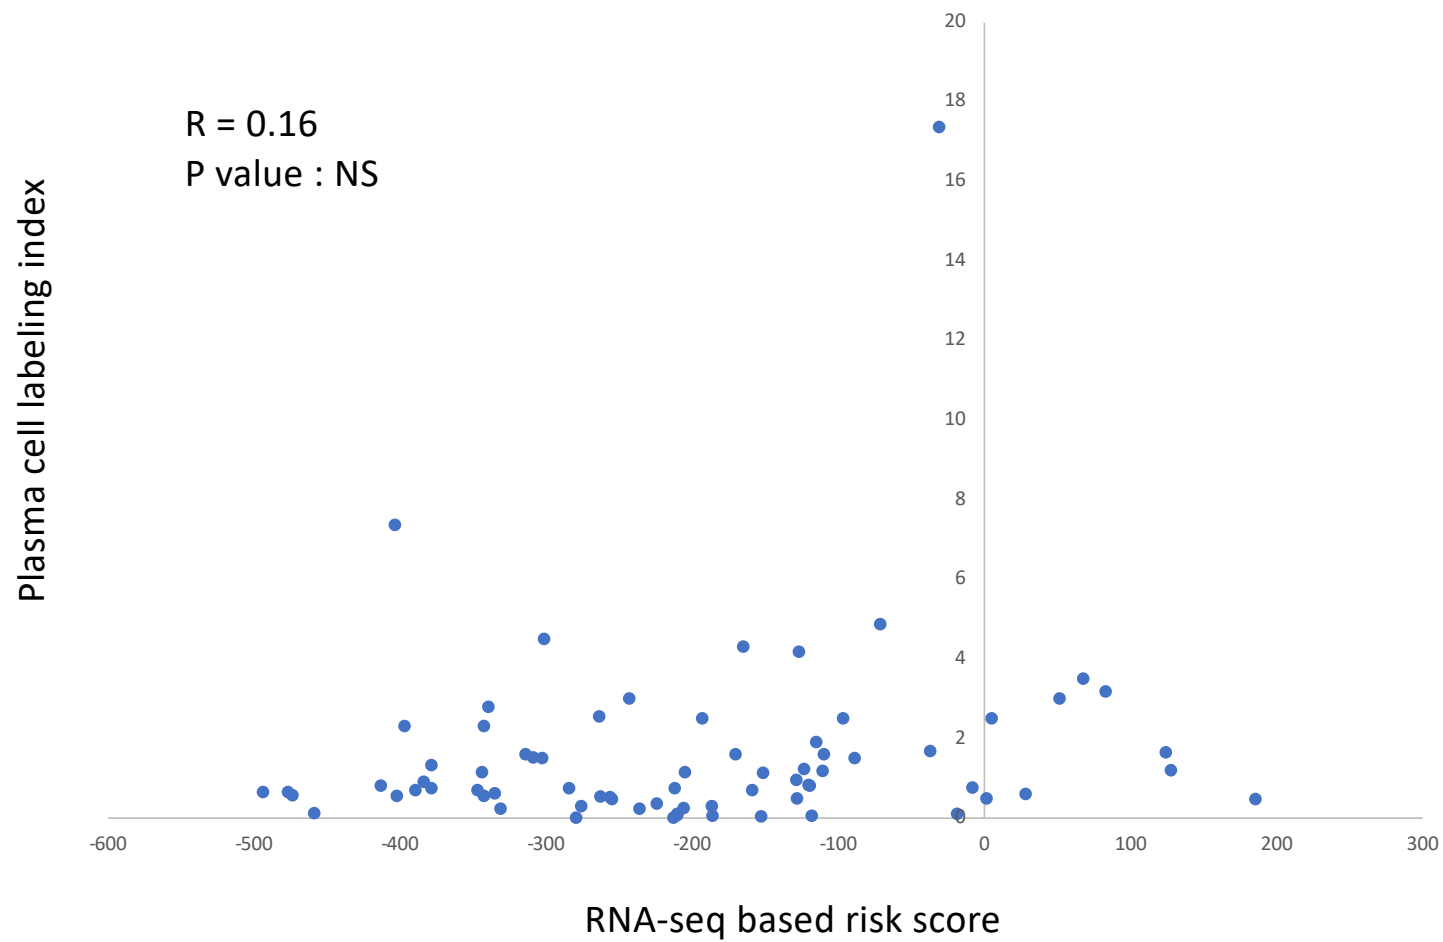

**Supplementary Figure S1:** Correlations between plasma cell labeling index (PCLI) and RNA-seq based risk score in the Montpellier cohort of 77 patients. NS = Non significant.
